# Supplementary material for: Acute Effect of Electronic Cigarette-Generated Aerosol From Flavored CBD-Containing Refill Solutions on Human Bronchial Epithelial Cells
Source: Front Physiol. 2020 Oct 21;11:592321. doi: 10.3389/fphys.2020.592321 (PMC7609837; doi:10.3389/fphys.2020.592321)
Supplement: Supplementary file 1 [file Table_1.xlsx]

## Sheet: Supplemental Table 1
Supplemental Table 1
		Flavor+CBD vs Flavor-CBD		Flavor+CBD vs Unflavored+CBD
Metabolic Activity
Flavor	Flavor+CBD	Flavor-CBD	p value	Unflavored+CBD	p-value
F1, "Dark Side of the Moon"	74.6±33.0	88.3±15.2	0.6707	66.4±6.9	0.4274
F2, “Midnight Express”	40.6±4.2	68.9±10.8	<0.0001		<0.0001
F3, “Easy Rider”	42.6±9.1	82.6±20.6	<0.0001		<0.0001
F4, “Lizard King”	50.1±6.9	79.1±7.4	<0.0001		0.0298
F5, “Nice Dreams”	50.5±18.6	91.2±11.0	<0.0001		0.0033
% Viability
Flavor	Flavor+CBD	Flavor-CBD	p value	Unflavored+CBD	p-value
F1, "Dark Side of the Moon"	51.6±33.1	82.9±9.4	0.0068	41.4±21.3	0.6042
F2, “Midnight Express”	28.7±21.2	37.9±22.8	0.2722		0.1235
F3, “Easy Rider”	22.4±11.3	54.0±21.9	0.0014		0.0355
F4, “Lizard King”	31.3±19.3	44.6±28.5	0.3114		0.242
F5, “Nice Dreams”	28.3±18.4	62.2±24.0	0.0014		0.1322
IL-1β
Flavor	Flavor+CBD	Flavor-CBD	p value	Unflavored+CBD	p-value
F1, "Dark Side of the Moon"	1.4X10-4±2.3x10-4	1.3X10-5±2.0x10-6	0.668	4.1X10-5±4.4x10-5	0.6624
F2, “Midnight Express”	7.4X10-5±5.8x10-5	6.8X10-5±4.9x10-5	0.668		0.1287
F3, “Easy Rider”	7.4X10-5±3.5x10-5	6.5X10-5±9.0x10-5	0.0431		0.0277
F4, “Lizard King”	8.4X10-5±7.5x10-5	5.9X10-5±7.2x10-5	0.1398		0.0954
F5, “Nice Dreams”	6.2X10-5±6.3x10-5	1.9X10-5±8.9x10-6	0.0232		0.3052
IL-6
Flavor	Flavor+CBD	Flavor-CBD	p value	Unflavored+CBD	p-value
F1, "Dark Side of the Moon"	1.4X10-4±1.2x10-4	1.2X10-4±9.4x10-5	0.9774	9.8X10-5±1.2x10-4	0.4436
F2, “Midnight Express”	2.4X10-4±1.9x10-4	3.3X10-5±2.8x10-5	0.0064		0.0337
F3, “Easy Rider”	3.1X10-4±3.0x10-4	6.1X10-5±6.2x10-5	0.0005		0.0231
F4, “Lizard King”	1.5X10-4±1.7x10-4	7.6X10-5±5.5x10-5	0.0137		0.0276
F5, “Nice Dreams”	1.4X10-4±6.6x10-4	1.1X10-4±7.4x10-5	0.0385		0.0029
IL-10
Flavor	Flavor+CBD	Flavor-CBD	p value	Unflavored+CBD	p-value
F1, "Dark Side of the Moon"	3.5X10-4±5.8x10-4	4.8X10-5±7.3x10-6	0.1398	1.2X10-4±8.9x10-5	0.2807
F2, “Midnight Express”	1.9X10-4±1.5x10-4	2.5X10-4±1.8x10-4	0.668		0.4134
F3, “Easy Rider”	1.6X10-4±1.0x10-4	2.3X10-4±3.3x10-4	0.3065		0.448
F4, “Lizard King”	2.1X10-4±2.0x10-4	2.1X10-4±2.6x10-4	0.8741		0.2781
F5, “Nice Dreams”	1.3X10-4±1.4x10-4	6.9X10-5±3.2x10-5	0.3917		0.8449
CXCL1
Flavor	Flavor+CBD	Flavor-CBD	p value	Unflavored+CBD	p-value
F1, "Dark Side of the Moon"	1.1X10-4±1.5x10-4	2.2X10-4±1.1x10-4	0.503	5.6X10-4±3.5x10-4	0.8427
F2, “Midnight Express”	8.6X10-4±6.1x10-4	1.1X10-4±1.0x10-4	0.9215		0.3827
F3, “Easy Rider”	9.9X10-4±8.6x10-4	5.2X10-4±7.1x10-4	0.0116		0.2845
F4, “Lizard King”	9.0X10-4±5.9x10-4	5.1X10-4±5.5x10-4	0.0197		0.2193
F5, “Nice Dreams”	8.7X10-4±7.6x10-4	2.4X10-4±1.2x10-4	0.192		0.6118
CXCL2
Flavor	Flavor+CBD	Flavor-CBD	p value	Unflavored+CBD	p-value
F1, "Dark Side of the Moon"	2.1X10-4±3.1x10-4	6.8X10-5±8.8x10-5	0.6767	1.1X10-4±5.2x10-5	0.6391
F2, “Midnight Express”	1.7X10-4±1.3x10-4	3.6X10-5±2.9x10-5	0.0065		0.2667
F3, “Easy Rider”	1.9X10-4±1.3x10-4	5.1X10-5±5.0x10-5	<0.0001		0.0693
F4, “Lizard King”	1.4X10-4±4.8x10-5	1.6X10-4±4.1x10-4	0.0002		0.2583
F5, “Nice Dreams”	1.8X10-4±1.1x10-4	8.7X10-5±1.6x10-4	0.0434		0.0858
CXCL10
Flavor	Flavor+CBD	Flavor-CBD	p value	Unflavored+CBD	p-value
F1, "Dark Side of the Moon"	1.5X10-4±3.6x10-4	2.4X10-5±3.7x10-6	0.009	1.1X10-4±5.7x10-5	0.1798
F2, “Midnight Express”	7.6X10-5±7.5x10-5	1.2X10-4±8.9x10-5	0.1199		0.1831
F3, “Easy Rider”	9.0X10-5±9.6x10-5	1.2X10-4±1.7x10-4	0.8733		0.339
F4, “Lizard King”	1.4X10-4±1.8x10-4	1.1X10-4±1.3x10-4	0.7474		0.5286
F5, “Nice Dreams”	1.5X10-4±1.6x10-4	3.5X10-5±1.6x10-5	0.008		0.7958
Supplemental Table 1. Unpaired nonparametric Mann-Whitney comparisons between the same commercially manufactured flavored refill solutions with and without CBD, 1.7 mg/ml. Flavored refill solutions with CBD were also compared to unflavored refill solutions without CBD, 1.7 mg/ml. Values are mean±SD.
